# Supplementary material for: A Population-Based Study on the Incidence, Risk Factors, and Outcome of Salmonella Bloodstream Infections in South Sweden 2012–2022
Source: Springer Nature journal article supplement (doi:10.1007/s40121-024-00929-y), 2024-02-23
Supplement: MOESM1 [file 26771248]

**Supplementary material.**

**A population-based study on the incidence, risk factors and outcome of *Salmonella* bloodstream infections in South Sweden 2012-2022**

**Authors:** Björklund L<sup>1</sup>, Mattisson Y<sup>1,2</sup>, Bläckberg A<sup>1,3</sup>, Sunnerhagen T<sup>1,4</sup> and Ljungquist O<sup>1,2</sup>

**Affiliations:**

<sup>1</sup> *Division of Infection Medicine, Department of Clinical Sciences, Lund University, Lund, Sweden*

<sup>2</sup> *Department of Infectious Diseases, Helsingborg hospital, Helsingborg, Sweden*

<sup>3</sup> *Department of Infectious Diseases, Skåne University Hospital, Lund, Sweden*

<sup>4</sup> *Clinical Microbiology, Infection Prevention and Control, Office for Medical Services, Region Skåne, Lund, Sweden*

Corresponding author: Oskar Ljungquist. [oskar.ljungquist@med.lu.se](mailto:oskar.ljungquist@med.lu.se)

**Table A1.** Antimicrobial resistance of *Salmonella* in bloodstream infections

| <b>Antibiotic</b>             | <b>Proportions of resistant islets</b> | <b>No of isolates tested</b> |
|-------------------------------|----------------------------------------|------------------------------|
| Cefotaxim                     | 4 (1%)                                 | 145                          |
| Ciprofloxacin                 | 25 (17%)                               | 144                          |
| Gentamicin                    | 4 (3%)                                 | 115                          |
| Imipenem                      | 0 (0%)                                 | 116                          |
| Meropenem                     | 9 (8%)                                 | 109                          |
| Piperacillin-Tazobactam       | 0 (0%)                                 | 86                           |
| Tobramycin                    | 0 (0%)                                 | 57                           |
| Trimethoprim-Sulfamethoxazole | 7 (5%)                                 | 142                          |
| Azithromycin                  | 0 (0%)                                 | 117                          |
